# Supplementary material for: Diagnostic value of anti-mitochondrial antibody in patients with primary biliary cholangitis: A systemic review and meta-analysis
Source: PubMed Central journal article supplement — Medicine (Baltimore). 2023 Nov 10;102(45):e36039. doi: 10.1097/MD.0000000000036039 (PMC10637435; doi:10.1097/md.0000000000036039), 2023-11-10
Supplement: medi-102-e36039-s001.pdf [file medi-102-e36039-s001.pdf]

**Table S1. Search strategy.**

| <b>Database</b>    | <b>Search strategy</b>                                                                                                                                                                                                                                                                                                                                                                                                                                                                                                                                    |
|--------------------|-----------------------------------------------------------------------------------------------------------------------------------------------------------------------------------------------------------------------------------------------------------------------------------------------------------------------------------------------------------------------------------------------------------------------------------------------------------------------------------------------------------------------------------------------------------|
| PubMed             | <p>(((((primary biliary cholangitis) OR primary biliary cirrhosis) OR pbc) OR autoimmune liver disease)) AND ((autoantibody) OR antibod*)) AND (((anti-mitochondrial antibody) OR ama) OR m2)</p> <p><b>Searching result: N=1030</b></p>                                                                                                                                                                                                                                                                                                                  |
| Embase             | <p>#1 ('primary biliary cholangitis'/exp OR 'primary biliary cholangitis' OR (primary AND biliary AND ('cholangitis'/exp OR cholangitis))) AND ('primary biliary cirrhosis'/exp OR 'primary biliary cirrhosis' OR (primary AND biliary AND ('cirrhosis'/exp OR cirrhosis))) AND pbc</p> <p>#2 'autoantibody'/exp OR autoantibody OR antibod* OR 'anti-mitochondrial antibody'/exp OR 'anti-mitochondrial antibody' OR ('anti mitochondrial' AND ('antibody'/exp OR antibody)) OR ama OR m2</p> <p>#3 #1 AND #2</p> <p><b>Searching result: N=2035</b></p> |
| The Web of Science | <p>((((ALL=(PBC)) OR ALL=(primary biliary cholangitis)) OR ALL=(autoimmune liver disease)) OR ALL=(liver disease) and (((ALL=(AMA)) OR ALL=(anti-mitochondrial )) OR ALL=(anti-mitochondrial antibodies)) OR ALL=(autoantibody) AND LA=(English))</p> <p><b>Searching result: N=1245</b></p>                                                                                                                                                                                                                                                              |
| Cochrane Library   | <p>#1 - (primary biliary cholangitis):ti,ab,kw OR (primary biliary cirrhosis):ti,ab,kw OR (pbc):ti,ab,kw OR (autoimmune liver disease):ti,ab,kw (Word variations have been searched)" (Word variations have been searched)</p> <p>#2 - (autoantibody):ti,ab,kw OR (antibodies):ti,ab,kw OR (anti-mitochondrial antibody):ti,ab,kw OR (ama):ti,ab,kw AND (M2):ti,ab,kw" (Word variations have been searched)</p> <p>#3 - #1 and #2</p> <p><b>Searching result: N=173</b></p>                                                                               |
