# Supplementary material for: Diagnostic value of anti-mitochondrial antibody in patients with primary biliary cholangitis: A systemic review and meta-analysis
Source: PubMed Central journal article supplement — Medicine (Baltimore). 2023 Nov 10;102(45):e36039. doi: 10.1097/MD.0000000000036039 (PMC10637435; doi:10.1097/md.0000000000036039), 2023-11-10
Supplement: medi-102-e36039-s002.pdf [file medi-102-e36039-s002.pdf]

**Table S2. Diagnostic accuracy of serum AMA for individual study.**

| <b>Author</b>                    | <b>Year</b> | <b>TP</b> | <b>FP</b> | <b>FN</b> | <b>TN</b> | <b>Sensitivity</b> | <b>Specificity</b> |
|----------------------------------|-------------|-----------|-----------|-----------|-----------|--------------------|--------------------|
| Assassi <sup>[1]</sup>           | 2009        | 7         | 9         | 9         | 792       | 43.8%              | 98.9%              |
| Bandin <sup>[2]</sup>            | 1996        | 270       | 5         | 15        | 492       | 94.7%              | 99.0%              |
| Bargou <sup>[3]</sup>            | 2008        | 54        | 0         | 1         | 51        | 98.2%              | 100.0%             |
| Cavazzana <sup>[4]</sup>         | 2011        | 14        | 5         | 9         | 173       | 60.9%              | 97.2%              |
| Chung <sup>[5]</sup>             | 2016        | 8         | 2         | 0         | 24        | 80.0%              | 100.0%             |
| Dighiero <sup>[6]</sup>          | 1987        | 21        | 18        | 6         | 666       | 77.8%              | 97.4%              |
| Gabeta <sup>[7]</sup>            | 2007        | 76        | 0         | 27        | 111       | 73.8%              | 100.0%             |
| Guatibonza-García <sup>[8]</sup> | 2021        | 19        | 10        | 24        | 32        | 44.2%              | 76.2%              |
| Han <sup>[8]</sup>               | 2017        | 28        | 9         | 7         | 99        | 91.4%              | 87.0%              |
| Hu <sup>[9]</sup>                | 2011        | 183       | 10        | 15        | 75        | 92.4%              | 88.2%              |
| Jong-Hon <sup>[10]</sup>         | 2001        | 49        | 0         | 14        | 291       | 77.8%              | 100.0%             |
| Lee <sup>[11]</sup>              | 1983        | 9         | 2         | 1         | 10        | 90.0%              | 83.3%              |
| Liu and Liu <sup>[12]</sup>      | 2010        | 4         | 31        | 0         | 8901      | 100.0%             | 99.7%              |
| Liu and Norman <sup>[13]</sup>   | 2010        | 985       | 65        | 190       | 1167      | 83.8%              | 94.7%              |
| Muratori <sup>[14]</sup>         | 2004        | 91        | 7         | 36        | 259       | 71.7%              | 97.4%              |
| Nagai <sup>[15]</sup>            | 1983        | 16        | 7         | 0         | 97        | 100.0%             | 93.3%              |
| Oertelt <sup>[16]</sup>          | 2007        | 96        | 0         | 24        | 124       | 80.0%              | 100.0%             |
| Romero-Gómez <sup>[17]</sup>     | 2004        | 95        | 4         | 41        | 34        | 69.9%              | 89.5%              |
| Sakugawa <sup>[18]</sup>         | 2003        | 6         | 4         | 1         | 111       | 85.7%              | 96.5%              |
| Sun <sup>[19]</sup>              | 2019        | 72        | 0         | 55        | 100       | 56.7%              | 100.0%             |
| Villalta <sup>[20]</sup>         | 2015        | 50        | 8         | 187       | 4         | 86.2%              | 97.9%              |
| Wang <sup>[21]</sup>             | 2015        | 58        | 0         | 0         | 30        | 100.0%             | 100.0%             |
| Yang J <sup>[22]</sup>           | 2016        | 98        | 4         | 18        | 120       | 84.5%              | 96.8%              |
| Yang Z <sup>[23]</sup>           | 2012        | 102       | 13        | 13        | 787       | 88.7%              | 98.4%              |

TP =True positive, FP = False positive, FN = False negative, TN = True negative.
