# Supplementary material for: Diagnostic value of anti-mitochondrial antibody in patients with primary biliary cholangitis: A systemic review and meta-analysis
Source: PubMed Central journal article supplement — Medicine (Baltimore). 2023 Nov 10;102(45):e36039. doi: 10.1097/MD.0000000000036039 (PMC10637435; doi:10.1097/md.0000000000036039), 2023-11-10
Supplement: medi-102-e36039-s003.pdf [file medi-102-e36039-s003.pdf]

**Table S3. Diagnostic accuracy of serum M2 subtype for individual study.**

| <b>Author</b>                | <b>Year</b> | <b>TP</b> | <b>FP</b> | <b>FN</b> | <b>TN</b> | <b>Sensitivity</b> | <b>Specificity</b> |
|------------------------------|-------------|-----------|-----------|-----------|-----------|--------------------|--------------------|
| Assassi <sup>[1]</sup>       | 2009        | 13        | 43        | 3         | 758       | 81.3%              | 94.6%              |
| Bargou <sup>[3]</sup>        | 2008        | 51        | 4         | 4         | 47        | 92.7%              | 92.2%              |
| Dighiero <sup>[6]</sup>      | 1987        | 27        | 38        | 0         | 646       | 100.0%             | 94.4%              |
| Gabeta <sup>[7]</sup>        | 2007        | 84        | 0         | 19        | 111       | 81.6%              | 100.0%             |
| Han <sup>[8]</sup>           | 2017        | 32        | 9         | 3         | 99        | 91.4%              | 91.7%              |
| Hu <sup>[9]</sup>            | 2011        | 173       | 20        | 25        | 65        | 87.4%              | 76.5%              |
| Imura-Kumada <sup>[24]</sup> | 2012        | 22        | 15        | 0         | 188       | 100.0%             | 92.6%              |
| Lu <sup>[25]</sup>           | 2017        | 33        | 0         | 16        | 60        | 67.3%              | 100.0%             |
| Milkiewicz <sup>[26]</sup>   | 2009        | 165       | 14        | 49        | 53        | 77.1%              | 79.1%              |
| Muratorj <sup>[14]</sup>     | 2004        | 100       | 6         | 27        | 260       | 78.7%              | 97.7%              |
| Nagai <sup>[15]</sup>        | 1983        | 16        | 2         | 0         | 102       | 100.0%             | 98.1%              |
| Sun <sup>[19]</sup>          | 2019        | 66        | 0         | 61        | 100       | 52.0%              | 100.0%             |
| Tang <sup>[27]</sup>         | 2017        | 60        | 0         | 0         | 37        | 100.0%             | 100.0%             |
| Villalta <sup>[20]</sup>     | 2015        | 45        | 13        | 187       | 4         | 77.6%              | 97.9%              |
| Wang <sup>[21]</sup>         | 2015        | 55        | 3         | 3         | 27        | 94.8%              | 90.0%              |
| Yang J <sup>[22]</sup>       | 2016        | 98        | 3         | 18        | 121       | 84.5%              | 97.6%              |

TP =True positive, FP = False positive, FN = False negative, TN = True negative
