# Supplementary figures and images for: Diagnostic value of anti-mitochondrial antibody in patients with primary biliary cholangitis: A systemic review and meta-analysis
Source: PubMed Central journal article supplement — Medicine (Baltimore). 2023 Nov 10;102(45):e36039. doi: 10.1097/MD.0000000000036039 (PMC10637435; doi:10.1097/md.0000000000036039), 2023-11-10

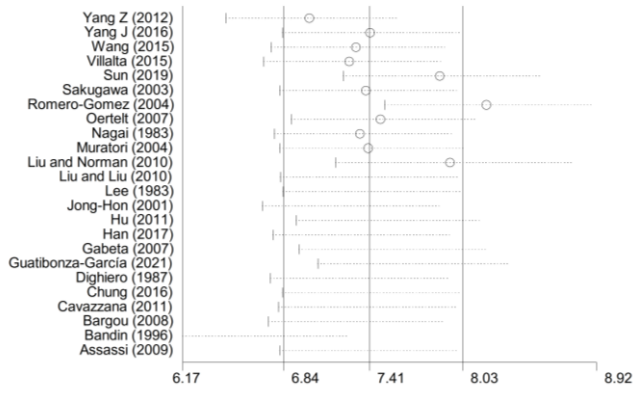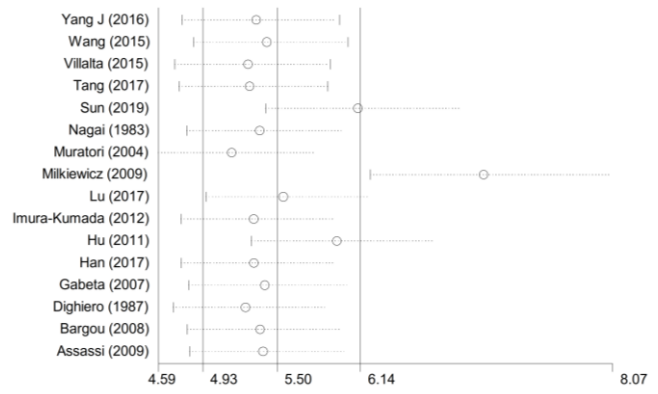

A

B

Figure S1. The sensitivity analysis. (A) AMA, (B) M2 subtype.

Supplement: medi-102-e36039-s004.pdf [file medi-102-e36039-s004.pdf]

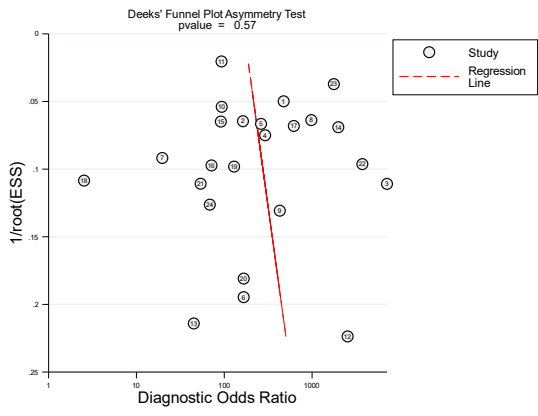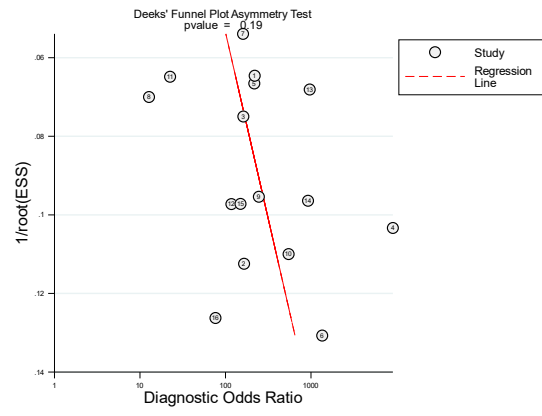

A

B

Figure S2. The publication bias. (A) AMA, (B) M2 subtype.

Supplement: medi-102-e36039-s005.pdf [file medi-102-e36039-s005.pdf]
